# Supplementary material for: Evaluating Potential Behavioral Mediators for Increasing Similarity in Friends’ Body Size among College Students
Source: MDPI journal article supplement (doi:10.3390/nu11091996), 2019-08-23
Supplement: s1 [file s1]

**S1. Social impact of Physical Activity and nutRition in College (SPARC) study survey questions for college students living in residence halls (2015-2016)**

| Construct    | Q No.                                                              | Item                                                                                                                                                                                                  | Responses                                                                                                                                                                                                         | Variable name (coding)                                                                                                      | Source                              | Time points assessed <sup>A</sup> |    |    |    |
|--------------|--------------------------------------------------------------------|-------------------------------------------------------------------------------------------------------------------------------------------------------------------------------------------------------|-------------------------------------------------------------------------------------------------------------------------------------------------------------------------------------------------------------------|-----------------------------------------------------------------------------------------------------------------------------|-------------------------------------|-----------------------------------|----|----|----|
|              |                                                                    |                                                                                                                                                                                                       |                                                                                                                                                                                                                   |                                                                                                                             |                                     | T1                                | T2 | T3 | T4 |
| Demographics | D1                                                                 | To begin the survey, please enter the participant ID given to you by the researchers below:                                                                                                           | Text entry                                                                                                                                                                                                        | pid (num)                                                                                                                   | Created                             | X                                 | C  | C  | C  |
|              | D2                                                                 | Please provide us with your first and last name along with your email address. <b>Your Amazon gift card(s) will be sent over email so please make sure to give us the best email to reach you at.</b> | First name: _____<br>Last name: _____<br>Email address: _____                                                                                                                                                     | d_first (string)<br>d_last (string)<br>d_email (string)                                                                     | Created                             | X                                 | C  | C  | C  |
|              |                                                                    |                                                                                                                                                                                                       |                                                                                                                                                                                                                   |                                                                                                                             |                                     | X                                 |    |    |    |
|              |                                                                    |                                                                                                                                                                                                       |                                                                                                                                                                                                                   |                                                                                                                             |                                     | X                                 |    |    |    |
|              | D3                                                                 | What is your gender?                                                                                                                                                                                  | 1. Male<br>2. Female<br>3. Transgender                                                                                                                                                                            | d_genFMT<br>d_genFMT_num (1-3)                                                                                              | Created                             | X                                 | X  |    |    |
|              |                                                                    | What is your Sex?                                                                                                                                                                                     | 1. Male<br>0. Female<br>[For phases 1-2, derived from d_genFMT, T coded to the sex as reported elsewhere]                                                                                                         | d_gen<br>d_gen_num (0/1)                                                                                                    |                                     | X                                 | X  | X  | X  |
|              | D5                                                                 | How do you usually describe yourself? (check all that apply)                                                                                                                                          | 1. White<br>2. Black or African American<br>3. Hispanic or Latino/a<br>4. Asian or Pacific Islander<br>5. American Indian or Alaska Native<br>6. Some other race (please specify): _____                          | d_white (0/1)<br>d_black (0/1)<br>d_hisp (0/1)<br>d_asian (0/1)<br>d_amna (0/1)<br>d_raceoth (0/1)<br>d_raceothtxt (string) | <sup>1</sup> Neumark-Sztainer, 2002 | X                                 |    |    |    |
|              |                                                                    |                                                                                                                                                                                                       | Race/ethnicity (to use as a covariate in a model)<br>1. White<br>2. Black<br>3. Hispanic<br>4. Other                                                                                                              | d_raceeth4<br>d_raceeth4_num (1-4)                                                                                          |                                     | X                                 | C  | C  | C  |
|              | CL2                                                                | What is your year in college?                                                                                                                                                                         | 1. 1 <sup>st</sup> year undergraduate<br>2. 2 <sup>nd</sup> year undergraduate<br>3. 3 <sup>rd</sup> year undergraduate<br>4. 4 <sup>th</sup> year undergraduate<br>5. 5 <sup>th</sup> year or more undergraduate | cl_year (1-5)                                                                                                               | Created                             | X                                 |    |    |    |
|              | CL7                                                                | Are you a Pell Grant recipient?                                                                                                                                                                       | 1. Yes<br>2. No<br>3. I do not know ("No" and "I don't know" combined)                                                                                                                                            | cl_pell2 (0/1)                                                                                                              | Created                             | X                                 | C  | X  | C  |
| CL10         | Please answer the following questions about your living situation. |                                                                                                                                                                                                       |                                                                                                                                                                                                                   |                                                                                                                             |                                     |                                   |    |    |    |

|      |                                                                                                                               |                                                                          |                                                                                                       |                                                                                                                 |                  |   |   |   |   |
|------|-------------------------------------------------------------------------------------------------------------------------------|--------------------------------------------------------------------------|-------------------------------------------------------------------------------------------------------|-----------------------------------------------------------------------------------------------------------------|------------------|---|---|---|---|
|      | CL 10.1                                                                                                                       | Have <b>you</b> moved since the last time you took this survey?          | 1. Yes<br>0. No                                                                                       | cl_moved (0/1)                                                                                                  | Created          |   | X | X | X |
|      | CL 10.2                                                                                                                       | Has your <b>roommate</b> moved since the last time you took this survey? |                                                                                                       | cl_roommatemoved (0/1)                                                                                          |                  |   | X | X | X |
| CL11 | Which dorm do you live in? (Only asked at times 2-4 if indicated that they moved)                                             |                                                                          |                                                                                                       | cl_dormqualtrics<br>cl_dormqualtrics_num (1-20)<br>cl_dormqualtricsothtxt (string)                              | <sup>4</sup> ASU | X | X | X | X |
|      |                                                                                                                               |                                                                          |                                                                                                       | cl_dorm17<br>cl_dorm17_num (1-17)<br>[derived from cl_dormqualtrics, housing doc, and intake form]              |                  | X | C | C | C |
| CL12 | What is your floor and room/suite number in (fill in dorm from above)? (Only asked at times 2-4 if indicated that they moved) |                                                                          |                                                                                                       |                                                                                                                 |                  |   |   |   |   |
|      | CL12.1                                                                                                                        | Floor #                                                                  | Type in: Floor number                                                                                 | cl_dormfloorqualtrics (num)<br>cl_floor (num)<br>[derived from cl_floorqualtrics, housing doc, and intake form] | Created          | X | X | X | X |
|      |                                                                                                                               |                                                                          |                                                                                                       |                                                                                                                 |                  | X | C | C | C |
|      | CL12.2                                                                                                                        | Room/suite #                                                             | Type in: Room/suite number                                                                            | cl_dormroomqualtrics (num)<br>cl_room (num)<br>[derived from cl_roomqualtrics, housing doc, and intake form]    |                  | X | X | X | X |
|      |                                                                                                                               |                                                                          |                                                                                                       |                                                                                                                 |                  | X | C | C | C |
|      |                                                                                                                               |                                                                          | Current dorm<br>(list of dorms same as for "DORM" variable)                                           | cl_currentdorm17<br>cl_currentdorm17_num (1-16)                                                                 |                  |   | X | X | X |
|      |                                                                                                                               |                                                                          | Current floor                                                                                         | cl_currentfloor (num)                                                                                           |                  |   | X | X | X |
|      |                                                                                                                               |                                                                          | Current room                                                                                          | cl_currentroom (num)                                                                                            |                  |   | X | X | X |
| CL13 | Do you have a roommate? (Only asked at times 2-4 if indicated that they or their roommate moved)                              |                                                                          | 1. Yes, I have a roommate (please list first and last name): _____<br>0. No, I do not have a roommate | cl_roommate (0/1)<br>cl_roommatenametxt (string)                                                                | Created          | X | X | X | X |
|      |                                                                                                                               |                                                                          | Converting name text to:<br>5 digit roommate identifier                                               | cl_roommatepid (num)                                                                                            |                  | X | X | X | X |
|      |                                                                                                                               |                                                                          |                                                                                                       |                                                                                                                 |                  | X | X | X | X |
| FR3  | Please rank your top 5 <b>male</b> and top 5 <b>female</b> friends <b>at ASU</b> (the first being your best friend, the       |                                                                          |                                                                                                       |                                                                                                                 |                  |   |   |   |   |

|  |                                                    |                                                                              |                          |                                                                                                                                                                                                                                                                                           |                                                                                                                                                                                             |                                                                                                                                                              |   |   |   |   |
|--|----------------------------------------------------|------------------------------------------------------------------------------|--------------------------|-------------------------------------------------------------------------------------------------------------------------------------------------------------------------------------------------------------------------------------------------------------------------------------------|---------------------------------------------------------------------------------------------------------------------------------------------------------------------------------------------|--------------------------------------------------------------------------------------------------------------------------------------------------------------|---|---|---|---|
|  | second being your next closest friend, and so on). |                                                                              |                          |                                                                                                                                                                                                                                                                                           |                                                                                                                                                                                             |                                                                                                                                                              |   |   |   |   |
|  | FR3.1                                              | Male                                                                         | 1. First name, Last name | fr_male1_first (string)<br>fr_male2_first (string)<br>fr_male3_first (string)<br>fr_male4_first (string)<br>fr_male5_first (string)<br>fr_male1_last (string)<br>fr_male2_last (string)<br>fr_male3_last (string)<br>fr_male4_last (string)<br>fr_male5_last (string)                     | <sup>11</sup> Adapted from: Holahan, 1978<br><br><sup>12</sup> Adapted from: Paxton, 1999<br><br><sup>13</sup> Adapted from: Wang, 2006<br><br><sup>14</sup> Adapted from: Add Health, 2009 | X                                                                                                                                                            | X | X | X |   |
|  | FR3.2                                              | Female                                                                       |                          | fr_female1_first (string)<br>fr_female2_first (string)<br>fr_female3_first (string)<br>fr_female4_first (string)<br>fr_female5_first (string)<br>fr_female1_last (string)<br>fr_female2_last (string)<br>fr_female3_last (string)<br>fr_female4_last (string)<br>fr_female5_last (string) |                                                                                                                                                                                             |                                                                                                                                                              |   |   |   |   |
|  |                                                    |                                                                              |                          | Replace alter names with PID/identifier code                                                                                                                                                                                                                                              |                                                                                                                                                                                             | fr_male1pid<br>fr_male2pid<br>fr_male3pid<br>fr_male4pid<br>fr_male5pid<br>fr_female1pid<br>fr_female2pid<br>fr_female3pid<br>fr_female4pid<br>fr_female5pid | X | X | X | X |
|  | FR4                                                | For each friend, please provide the dorm they live in. (for each 10 friends) |                          |                                                                                                                                                                                                                                                                                           |                                                                                                                                                                                             |                                                                                                                                                              |   |   |   |   |
|  | FR4.1                                              | Dorm                                                                         |                          | fr_maledorm1<br>fr_maledorm2<br>fr_maledorm3<br>fr_maledorm4<br>fr_maledorm5<br>fr_femaledorm1<br>fr_femaledorm2<br>fr_femaledorm3<br>fr_femaledorm4<br>fr_femaledorm5                                                                                                                    | <sup>4</sup> ASU                                                                                                                                                                            | X                                                                                                                                                            | X | X | X |   |

|        |     |                                                     |                                                      |                                                                                                                                                                                                                                                                                      |                                                                                                                                                                                                                                                                  |                                         |   |   |   |   |
|--------|-----|-----------------------------------------------------|------------------------------------------------------|--------------------------------------------------------------------------------------------------------------------------------------------------------------------------------------------------------------------------------------------------------------------------------------|------------------------------------------------------------------------------------------------------------------------------------------------------------------------------------------------------------------------------------------------------------------|-----------------------------------------|---|---|---|---|
|        |     |                                                     |                                                      | fr_maledorm1_num (1-22)<br>fr_maledorm2_num (1-22)<br>fr_maledorm3_num (1-22)<br>fr_maledorm4_num (1-22)<br>fr_maledorm5_num (1-22)<br>fr_femaledorm1_num (1-22)<br>fr_femaledorm2_num (1-22)<br>fr_femaledorm3_num (1-22)<br>fr_femaledorm4_num (1-22)<br>fr_femaledorm5_num (1-22) |                                                                                                                                                                                                                                                                  |                                         |   |   |   |   |
|        |     | FR 4.2                                              | Dorm floor                                           | 1. Dropdown: 1st-15th floor, does NOT live in the dorms, I do not know                                                                                                                                                                                                               | fr_malefloor1 (1-17)<br>fr_malefloor2 (1-17)<br>fr_malefloor3 (1-17)<br>fr_malefloor4 (1-17)<br>fr_malefloor5 (1-17)<br>fr_femalefloor1 (1-17)<br>fr_femalefloor2 (1-17)<br>fr_femalefloor3 (1-17)<br>fr_femalefloor4 (1-17)<br>fr_femalefloor5 (1-17)           | Created                                 | X | X | X | X |
|        |     |                                                     |                                                      |                                                                                                                                                                                                                                                                                      |                                                                                                                                                                                                                                                                  |                                         |   |   |   |   |
|        |     | FR5.3                                               | Roommate                                             | Dropdown<br>1. Yes<br>0. No                                                                                                                                                                                                                                                          | fr_maleroomate1 (0/1)<br>fr_maleroomate2 (0/1)<br>fr_maleroomate3 (0/1)<br>fr_maleroomate4 (0/1)<br>fr_maleroomate5 (0/1)<br>fr_femaleroomate1 (0/1)<br>fr_femaleroomate2 (0/1)<br>fr_femaleroomate3 (0/1)<br>fr_femaleroomate4 (0/1)<br>fr_femaleroomate5 (0/1) | Created                                 | X | X | X | X |
| Stress | SD1 | How often in the past <u>1 month</u> have you felt: |                                                      |                                                                                                                                                                                                                                                                                      |                                                                                                                                                                                                                                                                  |                                         |   |   |   |   |
|        |     | SD1.1                                               | Unable to control the important things in your life? | 1. Never<br>2. Rarely<br>3. Sometimes                                                                                                                                                                                                                                                | sd_control (1-4)                                                                                                                                                                                                                                                 | <sup>20</sup> Adapted from: Cohen, 1983 | X | X | X | X |

|               |       |                                                                                                                                |                                                                                                          |                                                     |                                     |                                        |     |     |     |     |
|---------------|-------|--------------------------------------------------------------------------------------------------------------------------------|----------------------------------------------------------------------------------------------------------|-----------------------------------------------------|-------------------------------------|----------------------------------------|-----|-----|-----|-----|
|               |       | SD1.2                                                                                                                          | Confident about your ability to handle your personal problems?                                           | 4. Often                                            | sd_confident (1-4)<br>[backcoded]   |                                        | X   | X   | X   | X   |
|               |       | SD1.3                                                                                                                          | Things were going your way?                                                                              |                                                     | sd_yourway (1-4)<br>[reverse coded] |                                        | X   | X   | X   | X   |
|               |       | SD1.4                                                                                                                          | Difficulties were piling up so high that you could not overcome them?                                    |                                                     | sd_difficult (1-4)                  |                                        | X   | X   | X   | X   |
|               |       | Stress scale (sum SD1.1 – SD1.4)                                                                                               |                                                                                                          |                                                     | sd_stressscale (4-16)               |                                        | X   | X   | X   | X   |
|               |       | Stress scale Cronbach's alpha                                                                                                  |                                                                                                          |                                                     |                                     |                                        | .68 | .73 | .75 | .72 |
| Depression    |       | How often in the past <u>1 month</u> have you felt:                                                                            |                                                                                                          |                                                     |                                     |                                        |     |     |     |     |
|               |       | SD1.5                                                                                                                          | Things were hopeless?                                                                                    | 1. Never<br>2. Rarely<br>3. Sometimes<br>4. Often   | sd_hopeless (1-5)                   | <sup>21</sup> Adapted from: ACHA, 2013 | X   | X   | X   | X   |
|               |       | SD1.6                                                                                                                          | Overwhelmed by all you had to do?                                                                        |                                                     | sd_overwhelmed (1-5)                |                                        | X   | X   | X   | X   |
|               |       | SD1.7                                                                                                                          | Very lonely?                                                                                             |                                                     | sd_lonely (1-5)                     |                                        | X   | X   | X   | X   |
|               |       | SD1.8                                                                                                                          | Very sad?                                                                                                |                                                     | sd_sad (1-5)                        |                                        | X   | X   | X   | X   |
|               |       | SD1.9                                                                                                                          | So depressed that it was difficult to function?                                                          |                                                     | sd_depressed (1-5)                  |                                        | X   | X   | X   | X   |
|               |       | SD1.10                                                                                                                         | Overwhelming anxiety?                                                                                    |                                                     | sd_anxiety (1-5)                    |                                        | X   | X   | X   | X   |
|               |       | Depression scale Cronbach's alpha                                                                                              |                                                                                                          |                                                     |                                     |                                        | .89 | .89 | .90 | .90 |
|               |       | Depression scale (dichotomized)<br>1. High levels depressive symptoms<br>0. Low levels depressive symptoms                     |                                                                                                          |                                                     | sd_depressionscale2 (0/1)           |                                        | X   | X   | X   | X   |
| Food Security | FS1   | Please indicate how often each statement was true for you in the last <u>1 month</u> :                                         |                                                                                                          |                                                     |                                     |                                        |     |     |     |     |
|               |       | FS1.1                                                                                                                          | The food that I bought just didn't last, and I didn't have money to get more                             | 1. Often true<br>2. Sometimes true<br>3. Never true | fs_notlast<br>fs_notlast_num (1-3)  | <sup>23</sup> Adapted from: ERS        | X   | X   | X   | X   |
|               | FS1.2 | I couldn't afford to eat balanced meals                                                                                        | fs_afford<br>fs_afford_num (1-3)                                                                         |                                                     | X                                   |                                        | X   | X   | X   |     |
|               | FS2   | In the past <u>1 month</u> , did you ever cut the size of your meals or skip meals because there wasn't enough money for food? | 1. No<br>2. Yes, only 1 or 2 weeks<br>3. Yes, some weeks but not every week<br>4. Yes, almost every week | fs_cut<br>fs_cut_num (1-4)                          | <sup>23</sup> Adapted from: ERS     | X                                      | X   | X   | X   |     |
|               | FS3   | Please indicate if each statement was true for you in the last <u>1 month</u> :                                                |                                                                                                          |                                                     |                                     |                                        |     |     |     |     |

|                                 |     |                                                                                                                             |                                                                                                                                                                                    |                                                                                                                                           |                          |                         |                                                                                                        |   |   |   |   |
|---------------------------------|-----|-----------------------------------------------------------------------------------------------------------------------------|------------------------------------------------------------------------------------------------------------------------------------------------------------------------------------|-------------------------------------------------------------------------------------------------------------------------------------------|--------------------------|-------------------------|--------------------------------------------------------------------------------------------------------|---|---|---|---|
|                                 |     | FS3.1                                                                                                                       | Did you ever eat less than you felt you should because there wasn't enough money for food?                                                                                         | 1. Yes<br>0. No                                                                                                                           | fs_less (0/1)            | 23<br>Adapted from: ERS | X                                                                                                      | X | X | X |   |
|                                 |     | FS3.2                                                                                                                       | Were you ever hungry but didn't eat because there wasn't enough money for food?                                                                                                    |                                                                                                                                           | fs_hunger (0/1)          |                         | X                                                                                                      | X | X | X |   |
|                                 |     |                                                                                                                             | Food insecure (Selected "yes" to at least 2 of the above questions)<br>1. Yes<br>0. No                                                                                             |                                                                                                                                           | fs_fi<br>fs_fi_num (0/1) |                         | X                                                                                                      | X | X | X |   |
| Eating Behaviors                | EB1 | In the past 7 days, how often did you eat the following:                                                                    |                                                                                                                                                                                    |                                                                                                                                           |                          |                         | *24 Adapted from Larson, 2012<br><br>**25 Adapted from Rodriguez<br><br>***26 Adapted from Laska, 2014 | X | X | X | X |
|                                 |     | EB1.1                                                                                                                       | Breakfast?                                                                                                                                                                         | 0. Never                                                                                                                                  | eb_breakfast (0-7)*      | X                       |                                                                                                        | X | X | X |   |
|                                 |     | EB1.2                                                                                                                       | Evening meal?                                                                                                                                                                      | 1. 1 day                                                                                                                                  | eb_evening (0-7)***      | X                       |                                                                                                        | X | X | X |   |
|                                 |     | EB1.3                                                                                                                       | Fast foods (e.g., McDonald's, Raising Canes, Taco Bell, Dominos, Panda Express, etc.)?                                                                                             | 2. 2 days<br>3. 3 days<br>4. 4 days<br>5. 5 days<br>6. 6 days<br>7. 7 days                                                                | eb_fastfood (0-7)*       | X                       |                                                                                                        | X | X | X |   |
|                                 |     | EB1.4                                                                                                                       | Sit-down restaurant food (e.g., Olive Garden, Oreganos, etc.)?                                                                                                                     |                                                                                                                                           | eb_restaurant (0-7)**    | X                       |                                                                                                        | X | X | X |   |
|                                 |     | EB1.5                                                                                                                       | Dining hall food?                                                                                                                                                                  |                                                                                                                                           | eb_dininghall (0-7)**    | X                       |                                                                                                        | X | X | X |   |
|                                 |     | EB1.6                                                                                                                       | Home-cooked foods (e.g., meals made from scratch)?                                                                                                                                 |                                                                                                                                           | eb_homecook (0-7)**      | X                       |                                                                                                        | X | X | X |   |
| Eating Behaviors: Diet Screener | DS1 | During the <u>past month</u> , how often did you eat <b>hot or cold cereals</b> ? (if Never selected skip next 2 questions) | Never<br>1 time last month<br>2-3 times last month<br>1 time per week<br>2 times per week<br>3-4 times per week<br>5-6 times per week<br>1 time per day<br>2 or more times per day | 0 times/d<br>0.033 times/d<br>0.083 times/d<br>0.143 times/d<br>0.286 times/d<br>0.5 times/d<br>0.786 times/d<br>1 times/d<br>2 times/day | ds_cereal                | 28 NHANES 2009-2010     | X                                                                                                      | X | X | X |   |
|                                 | DS2 | During the <u>past month</u> , what kind of cereal did you usually eat? – <i>Type cereal</i>                                | Text entry                                                                                                                                                                         |                                                                                                                                           | ds_cerealtxt (string)    | 28 NHANES 2009-2010     | X                                                                                                      | X | X | X |   |
|                                 | DS3 | If there was another kind of cereal that you usually ate during                                                             | Text entry                                                                                                                                                                         |                                                                                                                                           | ds_cerealtxt2 (string)   | 28 NHANES 2009-2010     | X                                                                                                      | X | X | X |   |

|     |                                                                                                                                                                                                                                                                                                                                 |                                                                                                                                                                                                                              |                                                                                                                                                                      |                                                                    |                                   |  |   |   |   |   |
|-----|---------------------------------------------------------------------------------------------------------------------------------------------------------------------------------------------------------------------------------------------------------------------------------------------------------------------------------|------------------------------------------------------------------------------------------------------------------------------------------------------------------------------------------------------------------------------|----------------------------------------------------------------------------------------------------------------------------------------------------------------------|--------------------------------------------------------------------|-----------------------------------|--|---|---|---|---|
|     | the <u>past month</u> , what kind was it?<br>–Type cereal, if none leave blank                                                                                                                                                                                                                                                  |                                                                                                                                                                                                                              |                                                                                                                                                                      |                                                                    |                                   |  |   |   |   |   |
|     |                                                                                                                                                                                                                                                                                                                                 | NIH 8 digit code for cereal 1 & 2<br>(indicates the tertile classification for added sugar, whole grain density, fiber density, and calcium density)                                                                         |                                                                                                                                                                      | ds_c1code<br>ds_c2code                                             |                                   |  | X | X | X | X |
|     |                                                                                                                                                                                                                                                                                                                                 | Added sugar classification for cereal 1 & 2<br>(tsp added sugar/100 grams)<br>1. Lowest tertile: ≤0.71<br>2. Second tertile: 0.72-5.49<br>3. Highest tertile: >5.49                                                          |                                                                                                                                                                      | ds_c1sugt (1-3)<br>ds_c2sugt (1-3)                                 |                                   |  | X | X | X | X |
|     |                                                                                                                                                                                                                                                                                                                                 | Whole grain density classification for cereal 1 & 2 (oz-equivalents of whole grains/100 grams)<br>1. Lowest tertile: ≤0.21<br>2. Second tertile: 0.22-1.40<br>3. Highest tertile: >1.40                                      |                                                                                                                                                                      | ds_c1whgnt (1-3)<br>ds_c2whgnt (1-3)                               |                                   |  | X | X | X | X |
|     |                                                                                                                                                                                                                                                                                                                                 | Calcium density classification for cereal 1 & 2<br>(mg of calcium/100 grams)<br>1. Lowest tertile: ≤21<br>2. Second tertile: 22-100<br>3. Highest tertile: >100                                                              |                                                                                                                                                                      | ds_c1calcnt (1-3)<br>ds_c2calcnt (1-3)                             |                                   |  | X | X | X | X |
|     |                                                                                                                                                                                                                                                                                                                                 | Fiber density classification for cereal 1 & 2<br>(grams of fiber/100 grams)<br>1. Lowest tertile: ≤2.1<br>2. Second tertile: 2.2-7.3<br>3. Highest tertile: >7.3                                                             |                                                                                                                                                                      | ds_c1fibnt (1-3)<br>ds_c2fibnt (1-3)                               |                                   |  | X | X | X | X |
| DS4 | During the <u>past month</u> , how often did you have any <b>milk</b> (either to drink or on cereal)?<br>Include regular milks, chocolate, or other flavored milks, lactose-free milk, buttermilk and soy.<br>Please do <b>not</b> include small amounts of milk in coffee or tea.<br>(If Never is selected skip next question) | Never<br>1 time last month<br>2-3 times last month<br>1 time per week<br>2 times per week<br>3-4 times per week<br>5-6 times per week<br>1 time per day<br>2-3 times per day<br>4-5 times per day<br>6 or more times per day | 0 times/d<br>0.033 times/d<br>0.083 times/d<br>0.143 times/d<br>0.286 times/d<br>0.5 times/d<br>0.786 times/d<br>1 time/d<br>2.5 times/d<br>4.5 times/d<br>6 times/d | ds_milk                                                            | <sup>28</sup> NHANES<br>2009-2010 |  | X | X | X | X |
| DS5 | During the <u>past month</u> , what kind of milk did you usually drink?                                                                                                                                                                                                                                                         | 1. Whole or regular milk<br>2. 2% or reduced-fat milk<br>3. 1% or low-fat milk<br>4. Fat-free, skim or nonfat milk<br>5. Soy milk<br>6. Other kind of milk- <i>Type milk</i> _____<br>7. Almond (added in after backcoding)  |                                                                                                                                                                      | ds_milktype<br>ds_milktype_num (1-7)<br>ds_milktypeothtxt (string) | <sup>28</sup> NHANES<br>2009-2010 |  | X | X | X | X |
| DS6 | During the <u>past month</u> , how often did you drink:                                                                                                                                                                                                                                                                         |                                                                                                                                                                                                                              |                                                                                                                                                                      |                                                                    |                                   |  |   |   |   |   |

|  |  |       |                                                                                                                                                                                                                                                             |                                                                                                                                                                                                                              |                                                                                                                                                                      |                |                                                                 |   |   |   |   |
|--|--|-------|-------------------------------------------------------------------------------------------------------------------------------------------------------------------------------------------------------------------------------------------------------------|------------------------------------------------------------------------------------------------------------------------------------------------------------------------------------------------------------------------------|----------------------------------------------------------------------------------------------------------------------------------------------------------------------|----------------|-----------------------------------------------------------------|---|---|---|---|
|  |  | DS6.1 | <b>Regular</b> soda or pop that contains sugar? <i>Do not include diet soda.</i>                                                                                                                                                                            | Never<br>1 time last month<br>2-3 times last month<br>1 time per week<br>2 times per week<br>3-4 times per week<br>5-6 times per week<br>1 time per day<br>2-3 times per day<br>4-5 times per day<br>6 or more times per day | 0 times/d<br>0.033 times/d<br>0.083 times/d<br>0.143 times/d<br>0.286 times/d<br>0.5 times/d<br>0.786 times/d<br>1 time/d<br>2.5 times/d<br>4.5 times/d<br>6 times/d | ds_soda        | <sup>28</sup> NHANES<br>2009-2010<br><br><sup>29</sup> CCS 2010 | X | X | X | X |
|  |  | DS6.2 | <b>100% pure fruit juices</b> such as orange, mango, apple, grape and pineapple juices? <i>Do not include fruit-flavored drinks with added sugar or fruit juice you made at home and added sugar to.</i>                                                    |                                                                                                                                                                                                                              |                                                                                                                                                                      | ds_juice       |                                                                 | X | X | X | X |
|  |  | DS6.3 | Coffee or tea that had <b>sugar</b> or <b>honey</b> added to it? Include coffee and tea you sweetened yourself and presweetened tea and coffee drinks such as Arizona Tea and Frappuccino. <i>Do not include artificially sweetened coffee or diet tea.</i> |                                                                                                                                                                                                                              |                                                                                                                                                                      | ds_coffee      |                                                                 | X | X | X | X |
|  |  | DS6.4 | <b>Sweetened fruit drinks</b> such as Kool-Aid, Lemonade, or cranberry drink? Include fruit drinks you made at home and added sugar to. <i>Do not include diet drinks or artificially sweetened drinks.</i>                                                 |                                                                                                                                                                                                                              |                                                                                                                                                                      | ds_fruitdrink  |                                                                 | X | X | X | X |
|  |  | DS6.5 | <b>Sports drinks</b> such as Gatorade, Powerade, Vitamin Water, etc.? <i>Do not include diet drinks or artificially sweetened drinks.</i>                                                                                                                   |                                                                                                                                                                                                                              |                                                                                                                                                                      | ds_sportdrink  |                                                                 | X | X | X | X |
|  |  | DS6.6 | <b>Energy drinks</b> such as Red Bull, Monster, Rockstar, etc.? <i>Do not include diet</i>                                                                                                                                                                  |                                                                                                                                                                                                                              |                                                                                                                                                                      | ds_energydrink |                                                                 | X | X | X | X |



|     |                                                       |                                                                                                                                       |                                                                                |                                                              |                |                                   |   |   |   |   |  |  |
|-----|-------------------------------------------------------|---------------------------------------------------------------------------------------------------------------------------------------|--------------------------------------------------------------------------------|--------------------------------------------------------------|----------------|-----------------------------------|---|---|---|---|--|--|
|     |                                                       | <i>drinks or artificially sweetened drinks.</i>                                                                                       |                                                                                |                                                              |                |                                   |   |   |   |   |  |  |
| DS7 | During the <u>past month</u> , how often did you eat: |                                                                                                                                       |                                                                                |                                                              |                |                                   |   |   |   |   |  |  |
|     | DS7.1                                                 | <b>Fruit?</b> Include fresh, frozen or canned fruit. <i>Do not include juices.</i>                                                    | Never<br>1 time last month<br>2-3 times last month<br>1 time per week          | 0 times/d<br>0.033 times/d<br>0.083 times/d<br>0.143 times/d | ds_fruit       | <sup>28</sup> NHANES<br>2009-2010 | X | X | X | X |  |  |
|     | DS7.2                                                 | Green leafy or lettuce <b>salad</b> , with or without other vegetables?                                                               | 2 times per week<br>3-4 times per week<br>5-6 times per week<br>1 time per day | 0.286 times/d<br>0.5 times/d<br>0.786 times/d                | ds_salad       |                                   | X | X | X | X |  |  |
|     | DS7.3                                                 | Any kind of <b>fried potatoes</b> , include French fries, home fries, or hash brown potatoes?                                         | 2 or more times per day                                                        | 1 time/d                                                     | ds_friedpotato |                                   | X | X | X | X |  |  |
|     | DS7.4                                                 | Any <b>other kind of potatoes</b> , such as baked, boiled, mashed, sweet potatoes, or potato salad?                                   |                                                                                | 2 times/d                                                    | ds_othpotato   |                                   | X | X | X | X |  |  |
|     | DS7.5                                                 | Refried beans, baked beans, beans in soup, pork and beans or any other type of cooked dried beans? <i>Do not include green beans.</i> |                                                                                |                                                              | ds_beans       |                                   | X | X | X | X |  |  |
|     | DS7.6                                                 | <b>Brown rice</b> or other cooked whole grains, such as bulgur, cracked wheat, or millet? <i>Do not include white rice.</i>           |                                                                                |                                                              | ds_rice        |                                   | X | X | X | X |  |  |
|     | DS7.7                                                 | <b>Other vegetables</b> (not including previously mentioned green salads, potatoes, or cooked dried beans)?                           |                                                                                |                                                              | ds_othveg      |                                   | X | X | X | X |  |  |
|     | DS7.8                                                 | Mexican-type <b>salsa</b> made with tomato?                                                                                           |                                                                                |                                                              | ds_salsa       |                                   | X | X | X | X |  |  |
| DS8 | During the <u>past month</u> how often did you eat:   |                                                                                                                                       |                                                                                |                                                              |                |                                   |   |   |   |   |  |  |

|  |       |                                                                                                                                                                                                                                                                      |                                                                            |                                                                                                                                                                                    |                                                                                                                                        |          |                                   |   |   |   |   |
|--|-------|----------------------------------------------------------------------------------------------------------------------------------------------------------------------------------------------------------------------------------------------------------------------|----------------------------------------------------------------------------|------------------------------------------------------------------------------------------------------------------------------------------------------------------------------------|----------------------------------------------------------------------------------------------------------------------------------------|----------|-----------------------------------|---|---|---|---|
|  |       | DS8.1                                                                                                                                                                                                                                                                | <b>Pizza?</b> Including frozen pizza, fast food pizza, and homemade pizza. | Never<br>1 time last month<br>2-3 times last month<br>1 time per week<br>2 times per week<br>3-4 times per week<br>5-6 times per week<br>1 time per day<br>2 or more times per day | 0 times/d<br>0.033 times/d<br>0.083 times/d<br>0.143 times/d<br>0.286 times/d<br>0.5 times/d<br>0.786 times/d<br>1 time/d<br>2 times/d | ds_pizza | <sup>28</sup> NHANES<br>2009-2010 | X | X | X | X |
|  | DS8.2 | <b>Tomato sauces</b> such as with spaghetti noodles or mixed into foods such as lasagna? <i>Do not include tomato sauce on pizza.</i>                                                                                                                                | ds_sauce                                                                   |                                                                                                                                                                                    |                                                                                                                                        | X        |                                   | X | X | X |   |
|  | DS8.3 | Any kind of <b>cheese</b> ? Include cheese as a snack, cheese on burgers, sandwiches, and cheese in foods such as lasagna, quesadillas, or casseroles. <i>Do not include cheese on pizza.</i>                                                                        | ds_cheese                                                                  |                                                                                                                                                                                    |                                                                                                                                        | X        |                                   | X | X | X |   |
|  | DS8.4 | <b>Red meat</b> , such as beef, pork, ham, or sausage? Include red meat you had in sandwiches, lasagna, stew and other mixtures. Red meats may also include veal, lamb, and any lunch meats made with these meats. <i>Do not include chicken, turkey or seafood.</i> | ds_redmeat                                                                 |                                                                                                                                                                                    |                                                                                                                                        | X        |                                   | X | X | X |   |
|  | DS8.5 | <b>Processed meat</b> , such as bacon, lunch meats, or hot dogs? Include processed meats you had in sandwiches, soups, pizza, casseroles, and other mixtures. Processed meats are those preserved by smoking, curing, or salting, or by the                          | ds_processed                                                               |                                                                                                                                                                                    |                                                                                                                                        | X        |                                   | X | X | X |   |

|       |                                                                                                                                                                           |                                                                                                                                                                                    |                                                                                                                                        |                                        |                                |        |         |   |   |   |   |
|-------|---------------------------------------------------------------------------------------------------------------------------------------------------------------------------|------------------------------------------------------------------------------------------------------------------------------------------------------------------------------------|----------------------------------------------------------------------------------------------------------------------------------------|----------------------------------------|--------------------------------|--------|---------|---|---|---|---|
|       |                                                                                                                                                                           | addition of preservatives. Examples are: ham, bacon, pastrami, salami, sausages, bratwursts, frankfurters, hot dogs, and spam.                                                     |                                                                                                                                        |                                        |                                |        |         |   |   |   |   |
| DS9   | During the <u>past month</u> , how often did you eat:                                                                                                                     |                                                                                                                                                                                    |                                                                                                                                        |                                        |                                |        |         |   |   |   |   |
| DS9.1 | <b>Whole grain bread</b> including toast, rolls and in sandwiches? Whole grain breads include whole wheat, rye, oatmeal, pumpernickel. <i>Do not include white bread.</i> | Never<br>1 time last month<br>2-3 times last month<br>1 time per week<br>2 times per week<br>3-4 times per week<br>5-6 times per week<br>1 time per day<br>2 or more times per day | 0 times/d<br>0.033 times/d<br>0.083 times/d<br>0.143 times/d<br>0.286 times/d<br>0.5 times/d<br>0.786 times/d<br>1 time/d<br>2 times/d | ds_grain                               | <sup>28</sup> NHANES 2009-2010 | X      | X       | X | X |   |   |
| DS9.2 | <b>Chocolate</b> or any other types of candy? <i>Do not include sugar-free candy.</i>                                                                                     |                                                                                                                                                                                    |                                                                                                                                        | ds_chocolate                           |                                | X      | X       | X | X |   |   |
| DS9.3 | <b>Doughnuts</b> , sweet rolls, Danish, muffins, pan dulce, or pop-tarts? <i>Do not include sugar-free items.</i>                                                         |                                                                                                                                                                                    |                                                                                                                                        | ds_doughnut                            |                                | X      | X       | X | X |   |   |
| DS9.4 | <b>Cookies</b> , cakes, pie or brownies? <i>Do not include sugar-free kinds.</i>                                                                                          |                                                                                                                                                                                    |                                                                                                                                        | ds_cookie                              |                                | X      | X       | X | X |   |   |
| DS9.5 | <b>Ice cream</b> or other frozen desserts? <i>Do not include sugar-free kinds.</i>                                                                                        |                                                                                                                                                                                    |                                                                                                                                        | ds_icecream                            |                                | X      | X       | X | X |   |   |
| DS9.6 | <b>Popcorn?</b>                                                                                                                                                           |                                                                                                                                                                                    |                                                                                                                                        | ds_popcorn                             |                                | X      | X       | X | X |   |   |
|       |                                                                                                                                                                           |                                                                                                                                                                                    |                                                                                                                                        | Predicted intake of fiber (gm) per day |                                | DSQfib | Created | X | X | X | X |
|       |                                                                                                                                                                           | Predicted intake of calcium (mg) per day                                                                                                                                           | DSQcalc                                                                                                                                | Created                                | X                              | X      | X       | X |   |   |   |
|       |                                                                                                                                                                           | Predicted intake of whole grains (ounce equivalents) per day                                                                                                                       | DSQwhgr                                                                                                                                | Created                                | X                              | X      | X       | X |   |   |   |
|       |                                                                                                                                                                           | Predicted intake of total added sugars (tsp equivalents) per day                                                                                                                   | DSQsug                                                                                                                                 | Created                                | X                              | X      | X       | X |   |   |   |
|       |                                                                                                                                                                           | Predicted intake of dairy (cup equivalents) per day                                                                                                                                | DSQdairy                                                                                                                               | Created                                | X                              | X      | X       | X |   |   |   |
|       |                                                                                                                                                                           | Predicted intake of fruits and vegetables including legumes and French fries (cup equivalents) per day                                                                             | DSQfvl                                                                                                                                 | Created                                | X                              | X      | X       | X |   |   |   |

|         |       |                                                                                                                                                                           |                                                                                                          |                                                                                                                                           |                                        |                                               |   |   |   |   |
|---------|-------|---------------------------------------------------------------------------------------------------------------------------------------------------------------------------|----------------------------------------------------------------------------------------------------------|-------------------------------------------------------------------------------------------------------------------------------------------|----------------------------------------|-----------------------------------------------|---|---|---|---|
|         |       | Predicted intake of vegetables including legumes and French fries (cup equivalents) per day                                                                               |                                                                                                          | DSQvlall                                                                                                                                  | Created                                | X                                             | X | X | X |   |
|         |       | Predicted intake of fruits and vegetables including legumes and excluding French fries (cup equivalents) per day                                                          |                                                                                                          | DSQfvlnf                                                                                                                                  | Created                                | X                                             | X | X | X |   |
|         |       | Predicted intake of vegetables including legumes and excluding French fries (cup equivalents) per day                                                                     |                                                                                                          | DSQvlnf                                                                                                                                   | Created                                | X                                             | X | X | X |   |
|         |       | Predicted intake of fruits (cup equivalents) per day                                                                                                                      |                                                                                                          | DSQfrt                                                                                                                                    | Created                                | X                                             | X | X | X |   |
|         |       | Predicted intake of added sugars from sugar-sweetened beverages (tsp equivalents) per day                                                                                 |                                                                                                          | DSQssb                                                                                                                                    | Created                                | X                                             | X | X | X |   |
| Alcohol |       | Have you <u>ever</u> drank alcohol?                                                                                                                                       | 1. Yes<br>0. No                                                                                          | a_drinkalch (0/1)                                                                                                                         | Created                                | X                                             | X | X | X |   |
|         |       | For each day of the week in the calendar below, indicate the <b>number of alcoholic drinks typically consumed</b> on that day. (Only if yes to alcohol is selected)       | Dropdown from 1-15 drinks:<br>Monday<br>Tuesday<br>Wednesday<br>Thursday<br>Friday<br>Saturday<br>Sunday | a_drinkmon (num)<br>a_drinktue (num)<br>a_drinkwed (num)<br>a_drinkthur (num)<br>a_drinkfri (num)<br>a_drinksat (num)<br>a_drinksun (num) | <sup>34</sup><br>Kruse, 2005           | X                                             | X | X | X |   |
|         |       |                                                                                                                                                                           | Converting reported drinks into number of drinks/week                                                    | a_totweeklydrinks (num)                                                                                                                   |                                        | X                                             | X | X | X |   |
|         | A3    | During the last <u>two weeks</u> , how many times have you had <b>four alcoholic drinks in a row</b> ? (Only if female selected) (Only if yes to alcohol is selected)     | Never<br>1 day<br>2 days<br>3 days<br>4 or more days                                                     | 0<br>1<br>2<br>3<br>4                                                                                                                     | a_fourrow (0-4)                        | <sup>35</sup> Adapted from:<br>Wechsler, 1994 | X | X | X | X |
|         | A4    | During the last <u>two weeks</u> , how many times have you had <b>five alcoholic drinks in a row</b> ? (Only if not female selected) (Only if yes to alcohol is selected) |                                                                                                          | a_fiverow (1-5)                                                                                                                           | X                                      |                                               | X | X | X |   |
|         |       |                                                                                                                                                                           | Binge drinker? (4 or 5 alcoholic drinks in a row for females and males, respectively)<br>1. Yes<br>0. No |                                                                                                                                           | a_bingedrink (0/1)                     |                                               | X | X | X | X |
| Sleep   | SL1   | In the <u>past 7 days</u> , how often did the following occur?                                                                                                            |                                                                                                          |                                                                                                                                           |                                        |                                               |   |   |   |   |
|         | SL1.1 | You got enough sleep so that you felt rested when you woke up in the morning                                                                                              | 0. 0 days<br>1. 1 day<br>2. 2 days<br>3. 3 days<br>4. 4 days                                             | sl_enough (0-7)                                                                                                                           | <sup>21</sup> Adapted from: ACHA, 2013 | X                                             | X | X | X |   |
|         | SL1.2 | You woke up too early in the morning                                                                                                                                      | 5. 5 days<br>6. 6 days                                                                                   | sl_wokeup (1-8)                                                                                                                           |                                        | X                                             | X | X | X |   |

|                   |     |                                                                                             |                                                                                                                                                                                                                               |                                                                                                                                     |                                                            |                |                           |   |   |   |   |   |  |
|-------------------|-----|---------------------------------------------------------------------------------------------|-------------------------------------------------------------------------------------------------------------------------------------------------------------------------------------------------------------------------------|-------------------------------------------------------------------------------------------------------------------------------------|------------------------------------------------------------|----------------|---------------------------|---|---|---|---|---|--|
|                   |     |                                                                                             | and couldn't get back to sleep                                                                                                                                                                                                | 7. 7 days                                                                                                                           |                                                            |                |                           |   |   |   |   |   |  |
|                   |     | SL1.3                                                                                       | You felt tired, dragged out, or sleepy during the day                                                                                                                                                                         |                                                                                                                                     |                                                            | sl_tired (1-8) |                           |   | X | X | X | X |  |
|                   | SL2 | These next questions ask about your sleep patterns.                                         |                                                                                                                                                                                                                               |                                                                                                                                     |                                                            |                |                           |   |   |   |   |   |  |
|                   |     | SL2.2                                                                                       | On an <b>average weekday</b> , how many <b>hours</b> of sleep do you usually get?                                                                                                                                             | Dropdown (1-16 hours) (with half hour increments)                                                                                   | sl_wkdayhrs                                                | Created        |                           | X | X | X | X |   |  |
|                   |     | SL2.4                                                                                       | On an <b>average weekend day</b> how many <b>hours</b> of sleep do you usually get?                                                                                                                                           | Dropdown (1-16 hours) (with half hour increments)                                                                                   | sl_wkendhrs                                                | Created        |                           | X | X | X | X |   |  |
| Physical Activity | PA1 | In a <b>usual week</b> , how many hours do <b>you</b> spend doing the following activities: |                                                                                                                                                                                                                               |                                                                                                                                     |                                                            |                |                           |   |   |   |   |   |  |
|                   |     | PA1.1                                                                                       | <b>Strenuous exercise (heart beats rapidly)?</b> Examples: biking fast, aerobic dancing, running, jogging, swimming laps, rollerblading, skating, lacrosse, tennis, cross-country skiing, soccer, basketball, football, zumba | None<br>Less than 1/2 hour a week<br>1/2-2 hours a week<br>2 1/2-4 hours a week<br>4 1/2-6 hours a week<br>More than 6 hours a week | 0 min<br>30 min<br>75 min<br>195 min<br>315 min<br>360 min | pa_vig (1-6)   | <sup>39</sup> Godin, 1985 | X | X | X | X |   |  |
|                   |     | PA1.2                                                                                       | <b>Moderate exercise (not exhausting)?</b> Examples: walking quickly, baseball, gymnastics, easy bicycling, volleyball, skiing, dancing, skateboarding, snowboarding                                                          |                                                                                                                                     |                                                            | pa_mod (1-6)   |                           | X | X | X | X |   |  |
|                   |     | PA1.3                                                                                       | <b>Mild exercise (little effort)?</b> Examples: walking slowly (to school, to friend's house, etc.), bowling, golf, fishing, snowmobiling, yoga                                                                               |                                                                                                                                     |                                                            | pa_light (1-6) |                           | X | X | X | X |   |  |

|  |     |                                                                                                                                                                                                         |                                                                                                              |                 |                                                  |  |   |   |   |   |
|--|-----|---------------------------------------------------------------------------------------------------------------------------------------------------------------------------------------------------------|--------------------------------------------------------------------------------------------------------------|-----------------|--------------------------------------------------|--|---|---|---|---|
|  |     |                                                                                                                                                                                                         | Moderate-to-vigorous physical activity                                                                       | pa_mvpa (num)   |                                                  |  | X | X | X | X |
|  | PA3 | <b>Yesterday</b> , how much time did you spend in front of a screen (excluding time in class and being physically active)? This includes computers, tablets, smartphones, TV, video games, movies, etc. | 1. None<br>2. Less than ½ hour<br>3. ½- 2 hours<br>4. 2 ½- 4 hours<br>5. 4 ½-6 hours<br>6. More than 6 hours | pa_screen (1-6) | <sup>41</sup> Adapted from:<br>Fontaine,<br>2011 |  | X | X | X | X |

<sup>A</sup> X= asked at that time point or derived from a question asked at that time point; C= carried over from another time point into data set

## Citations

1. Neumark-Sztainer D, Croll J, Story M, Hannan PJ, French SA, Perry C. Ethnic/racial differences in weight-related concerns and behaviors among adolescent girls and boys: findings from Project EAT. *Journal of psychosomatic research*. 2002;53(5):963-974.
4. Arizona State University. Tempe Campus. <https://housing.asu.edu/content/tempe-campus>. Accessed 2014, 16 July.
11. Holahan CJ, Wilcox BL. Residential satisfaction and friendship formation in high-and low-rise student housing: An interactional analysis. *Journal of Educational psychology*. 1978;70(2):237.
12. Paxton SJ, Schutz HK, Wertheim EH, Muir SL. Friendship clique and peer influences on body image concerns, dietary restraint, extreme weight-loss behaviors, and binge eating in adolescent girls. *Journal of abnormal psychology*. 1999;108(2):255.
13. Wang SS, Houshyar S, Prinstein MJ. Adolescent girls' and boys' weight-related health behaviors and cognitions: associations with reputation-and preference-based peer status. *Health Psychology*. 2006;25(5):658.
14. Harris KM FF, Tabor J, Bearman PS, Jones J, Udry JR. The National Longitudinal Study of Adolescent Health: Research Design. Accessed May 2007.
20. Cohen S, Kamarck T, Mermelstein R. A global measure of perceived stress. *Journal of health and social behavior*. 1983:385-396.
21. American College Health Association-National College Health Assessment II. Hanover, MD: American College Health Association; 2013.
23. U.S. Household Food Security Survey Module: Six-Item Short Form Economic Research Service, USDA. 2012; [http://www.ers.usda.gov/datafiles/Food\\_Security\\_in\\_the\\_United\\_States/Food\\_Security\\_Survey\\_Modules/short2012.pdf](http://www.ers.usda.gov/datafiles/Food_Security_in_the_United_States/Food_Security_Survey_Modules/short2012.pdf). Accessed 13 April 2015.
24. Larson N, Laska MN, Story M, Neumark-Sztainer D. Predictors of fruit and vegetable intake in young adulthood. *Journal of the Academy of Nutrition and Dietetics*. 2012;112(8):1216-1222.
25. Rodriguez J. Resident Freshmen Diet and Exercise Survey. <http://www.unf.edu/~jrodrigu/survey.htm> Accessed 17 July, 2014.

26. Laska MN, Hearst MO, Lust K, Lytle LA, Story M. How we eat what we eat: identifying meal routines and practices most strongly associated with healthy and unhealthy dietary factors among young adults. *Public health nutrition*. 2014;1-11.
28. National Cancer Institute. Dietary Screener Questionnaire in the NHANES 2009-10. 2009; [http://appliedresearch.cancer.gov/nhanes/dietscreen/dsq\\_english.pdf](http://appliedresearch.cancer.gov/nhanes/dietscreen/dsq_english.pdf). Accessed 22 June, 2015.
29. National Cancer Institute. Dietary Screener Questionnaire in the NHIS Cancer Control Supplement (CCS) 2010. 2010; <http://healthcaresdelivery.cancer.gov/nhis/2010-screener/>. Accessed 22 June, 2015.
34. Kruse M, Corbin W, Fromme K. Improving accuracy of QF measures of alcohol use: Disaggregating quantity and frequency. Paper presented at: Poster presented at the 28th annual meeting of the Research Society on Alcoholism, Santa Barbara, CA2005.
35. Wechsler H, Davenport A, Dowdall G, Moeykens B, Castillo S. Health and behavioral consequences of binge drinking in college: A national survey of students at 140 campuses. *Jama*. 1994;272(21):1672-1677.
39. Godin G, Shephard RJ. A simple method to assess exercise behavior in the community. *Canadian journal of applied sport sciences Journal canadien des sciences appliquees au sport*. 1985;10(3):141-146.
41. Fountaine CJ, Liguori GA, Mozumdar A, Schuna Jr JM. Physical activity and screen time sedentary behaviors in college students. *International Journal of Exercise Science*. 2011;4(2):3.
